# 1 **Spatial and temporal partitioning and tree preference in California woodland** 2 **ants**

3 Dylan MacArthur-Waltz, Rebecca Nelson, Gail Lee, and Deborah M. Gordon\*

4  
5 **Affiliations:** Stanford University, Department of Biology, 371 Serra Mall, Stanford, CA 94305.

6  
7 **Correspondence:** Dr. Deborah Gordon, [dmgordon@stanford.edu](mailto:dmgordon@stanford.edu), (650) 725-6364.

8  
9 **Abstract:** Spatial and temporal partitioning of habitat may facilitate diversity and have important impacts  
10 on ant communities. To investigate niche overlap in an ant community in a northern California oak  
11 woodland, we observed ant foraging on trees in 4 seasonal surveys, each lasting 2 weeks, in a 9.5-hectare  
12 plot over the course of a year. Foraging activity in all 5 observed ant species differed by season, time of  
13 day, and/or the genera of trees used. Of the 3 ant species most frequently observed, *Camponotus*  
14 *semitestaceus* was most active during spring and summer nights, *Formica moki* was most active during  
15 spring and summer days, and *Prenolepis imparis* was most active during both day and night of fall and  
16 winter. All ant species preferred native trees to exotic trees and preferred evergreen trees to deciduous  
17 trees. Our results suggest that native evergreen oaks such as *Quercus agrifolia*, currently threatened by  
18 sudden oak death (*Phytophthora ramorum*), may be important for supporting ant biodiversity.

## 19 20 **Acknowledgements**

21 Authors DM, RN and DMG contributed equally to the writing of this manuscript. This project was  
22 financially supported by a Small Grant awarded by the Stanford University Office of Undergraduate  
23 Advising and Research. We gratefully acknowledge Angela Gu, Duncan Coleman, Eleanor Glockner,  
24 Julie Fukunaga, Katie Lan, and Miranda Vogt for many hours of field work assistance. We thank Rodolfo  
25 Dirzo, Daniel Friedman and Maria Wojakowski for providing advice and assistance with statistical

26 analysis. Leander D.L. Anderegg, Talia Borofsky, Kaleda Denton, and Tyler McFadden provided helpful  
27 comments on the manuscript. The Stanford Maps and Records Office (340 Bonair Siding, Stanford, CA  
28 94305) provided detailed maps of trees on the Stanford grounds that were invaluable for this project.

29

30 **Keywords:** Niche Partitioning, Foraging, Trees, Native/Non-Native, *Prenolepis imparis*

31

## 32 **Introduction**

33 A central question in community ecology is how communities preserve diversity despite  
34 interspecific competition (1–3). Ant communities are ideal systems for studying coexistence because they  
35 are diverse, may include many similar species (which are theoretically more likely to compete strongly),  
36 and greatly influence ecosystem function (4–6). Many ant species have strong associations with particular  
37 host plant species (6–8), and this may reduce competition among coexisting ant species.

38 Competing ant species exhibit niche partitioning in foraging activity along many different axes,  
39 including season (9–11), day and night (4,9,10,12–14), temperature range (15,16), and space (12,17).  
40 With some exceptions (9,10), few studies have examined how seasonal and diel scales interact to  
41 influence ant community structure.

42 Urban and fragmented ecosystems may create complex, patchwork habitats that allow some  
43 groups of organisms to partition niches effectively (18). Native ant biodiversity in northern California is  
44 strongly linked to urbanization; disturbed, urbanized habitats have lower native ant species richness but  
45 support higher levels of invasive ant species. (19). Many species of ants rely on the honeydew produced  
46 by hemipteran insects as a nutritious food source (20–22). Compared to native trees, non-native trees have  
47 been shown to provide an inferior food source for ants because they harbor, on average, a lower diversity  
48 and abundance of hemipterans (23).

49 In our study system, five common native ant species (*Camponotus semitestaceus*,  
50 *Formica moki*, *Liometopum occidentale*, *Prenolepis imparis*, and *Tapinoma sessile*) coexist in a mixed

51 native-exotic woodland in northern California in a Mediterranean climate with wet winters and dry  
52 summers. All five ant species forage on trees and all apparently forage on aphid honeydew (24–26).

53 Our study site has a mixture of native and exotic tree species planted over the last 200 years;  
54 previously the site was a mixture of grassland and oak savanna (27). Typical native tree species include  
55 oaks: *Quercus agrifolia*, *Q. lobata*, and *Q. douglasii*; typical exotic species include *Eucalyptus*  
56 *spp.*, *Olea europaea*, and *Schinus molle*. Oaks play an important role in maintaining biodiversity in  
57 California forests (28). *Quercus agrifolia* is vulnerable to sudden oak death (*Phytophthora ramorum*), a  
58 pathogen of emerging concern in northern California (28). Disturbances such as sudden oak death may  
59 negatively affect ant community dynamics.

60 We conducted seasonal surveys during both day and night, across a variety of tree genera, to  
61 examine niche partitioning in an urbanized, northern Californian ant community. We asked the following  
62 questions:

- 63 1: Do ant species differ in foraging activity across seasons?  
64 2: Do ant species differ in foraging activity between day and night?  
65 3: Do ant species differ in their use of tree genera, native versus exotic trees, and deciduous versus  
66 evergreen trees for foraging?

67

## 68 **Methods**

### 69 *Survey Region*

70 We surveyed ant activity on and around tree trunks in a 9.53 ha region of the wooded Arboretum  
71 on the Stanford University campus. The survey region consisted of mixed oak-exotic woodland without  
72 significant brushy understory. Trees were identified using maps from the Stanford Maps and Records  
73 office (340 Bonair Siding Rd., Stanford, CA), which included GPS coordinates and species for each tree.  
74 Common ant species at the site included *Camponotus semitestaceus*, *Formica moki*, *Liometopum*  
75 *occidentale*, *Prenolepis imparis*, and *Tapinoma sessile*. We did not observe any other ant species at our  
76 study site in significant abundance (i.e., inhabiting >10 trees in any season). We observed *Linepithema*

77 *humile* during spring, summer, and fall surveys in <10 trees on the northwestern edge of the survey  
78 region.

79 Four seasonal surveys, each lasting up to 2 weeks, were conducted in 2016-2017 from 29-July-  
80 2016 – 8-August-2016 (Summer); 12-November-2016 – 13-November-2016 (Fall); 22-February-2017 -  
81 26-February-2017 (Winter); and 12-May-2017 – 19-May-2017 (Spring). We surveyed each of  
82 approximately 870 trees twice during each season, once during the day and once at night, for a total of  
83 7008 individual tree observations. We did not survey on rainy days as ants were not active. We did not  
84 survey in the hour before or after sunrise and sunset. We eliminated trees that died between surveys from  
85 the sample set. For about 20 trees, growth around the base was too dense to allow observation, and those  
86 trees were not included in our final analysis.

87 Observations were made by the authors and six research assistants. Ants were identified to species  
88 in the field or after observations using specimens collected at the time of observation. During each survey,  
89 we observed the bottom 2m of the tree trunk and a 1m radius around the base of the tree. We recorded all  
90 ant species present on the trunk and the base, and we estimated their abundance as follows: low  
91 abundance = 1-5, medium abundance = 6-30, high abundance = >30 individuals. We also recorded the  
92 presence of trails of any ant species. A trail was recorded if ants appeared concentrated in a line on the  
93 tree trunk (as opposed to scattered randomly around the trunk) or if ants moving in opposite directions  
94 touched antennae in passing. Observations lasted approximately 30 seconds - 1 minute per tree. All data  
95 are available for download (29).

96 We observed but did not map the presence of nests within the survey region. We observed about  
97 10 nests of *Liometopum occidentale* only in *Quercus agrifolia*. We observed several *Prenolepis imparis*  
98 nests on the ground, greater than 10 *Camponotus semitestaceus* nests on the ground and 2 *Formica moki*  
99 nests on the ground. We did not find any *Tapinoma sessile* nests.

100

101 *Data Analysis*

102 All statistical tests were performed in RStudio Version 1.1.383. We compared ant presence across  
103 seasons, day/night, tree genera, and ant species using Kruskal-Wallis rank sum tests. We then performed a  
104 second series of Kruskal-Wallis tests with the same factors and ant abundance as the response variable,  
105 using the median values of our bins of ant abundance in each category (1-5 ants  $\cong$  3, 6-29 ants  $\cong$  18, 30+  
106 ants  $\cong$  100). Because the results of the presence/absence model and the abundance model were very  
107 similar (Table S1), we then used only the presence/absence model for species-specific analysis.

108 Season\*Day\_Night interaction terms were significant for the majority of species observed, so we  
109 combined Season (four levels) and Day\_Night (two levels) into a single factor with eight levels (for  
110 example, one level was Summer Day). We ran post hoc Dunn tests on this combined variable for each ant  
111 species. We adjusted all p-values using the Benjamini-Hochberg procedure.

112 For each of the 5 most common ant species: *Camponotus semitestaceus*,  
113 *Formica moki*, *Liometopum occidentale*, *Prenolepis imparis*, and *Tapinoma sessile*, we performed a  
114 Kruskal-Wallis tests on season, day/night, and genus individually. We used post hoc Dunn tests to  
115 determine the effect of season, day/night, and tree genus preference on ant presence for each individual  
116 species.

117 For each survey, we calculated the percentage of all deciduous, evergreen, native, and non-native  
118 trees that were occupied by any species of ant. We asked whether all species of ants preferentially used  
119 deciduous or evergreen trees, and native or exotic trees, using paired t-tests.

120

## 121 **Results**

### 122 **Question 1: Do ant species differ in foraging activity across seasons?**

123 The species present depended on season (Kruskal-Wallis,  $\chi^2 = 265.6$ ,  $p < 2.2 \times 10^{-16}$ ). *Camponotus*  
124 *semitestaceus* was observed most frequently during the spring and summer. *Formica moki* was observed  
125 most frequently during the spring and summer. *Liometopum occidentale* was observed most frequently  
126 during the summer. *Prenolepis imparis* was observed most frequently in the fall, slightly less frequently

127 in the winter, less in the spring, and rarely in the summer. *Tapinoma sessile* was observed most frequently  
128 during the summer (See Figure 1 for Dunn post hoc results).

129

130 **Question 2: Do ant species differ in foraging activity between day and night?**

131 Most species differed in activity between day and night (Kruskal-Wallis,  $\chi^2 = 92.0$ ,  $p < 2.2 \times 10^{-16}$ ,

132 Table S1), and these day-night differences varied among seasons. *Camponotus semitestaceus* was

133 significantly more active at night than during the day, and this activity level depended on season

134 (Kruskal-Wallis,  $\chi^2 = 1660$ ,  $p < 2.2 \times 10^{-16}$ ). *C. semitestaceus* was most often observed during spring and

135 summer nights and observed less commonly during fall and winter nights (Figure 1A). During all seasons

136 except winter, *Formica moki* was more active in the day than at night, and this activity level depended on

137 season (Kruskal-Wallis,  $\chi^2 = 897.98$ ,  $p < 2.2 \times 10^{-16}$ ). *F. moki* was most often observed on spring and

138 summer days (Figure 1B). Activity in *Liometopum occidentale* depended both on time of day and season

139 (Kruskal-Wallis,  $\chi^2 = 59.646$ ,  $p < 1.776 \times 10^{-10}$ ). *L. occidentale* was more active on summer days than any

140 time during fall, winter, and spring (Figure 1C). *Prenolepis imparis* was more active during the night in

141 winter and spring and more active during the day in fall (Kruskal-Wallis,  $\chi^2 = 1483.9$ ,  $p < 2.2 \times 10^{-16}$ ,

142 Figure 1D). Activity in *T. sessile* depended on a time of day/season interaction (Kruskal-Wallis,  $\chi^2$

143  $= 19.0$ ,  $p = 0.0083$ , Figure 1E). All post hoc Dunn test results are presented in Figure 1, and Kruskal-

144 Wallis results are presented in Tables S1 and S2.

145

146 **Figure 1.** Normalized ant presence by season and day/night for: (a) *Camponotus semitestaceus*;

147 (b) *Formica moki*; (c) *Liometopum occidentale*; (d) *Prenolepis imparis*; (e) *Tapinoma sessile*. Normalized ant

148 presence is the number of trees on which an ant species was present divided by the total number of trees surveyed.

149 Gray bars represent observations for day, and black bars represent observations for night. Letters show significant

150 differences in Dunn tests at the  $p < 0.05$  level.

151

152 **Question 3: Do ant species differ in their use of tree genera, native versus exotic trees, and**  
153 **deciduous versus evergreen trees for foraging?**

154 Species differed in their use of tree genera (Kruskal-Wallis,  $\chi^2=216.0$ ,  $p < 2.2 \times 10^{-16}$ ); this effect  
155 was observed in all species except *Tapinoma sessile* (Kruskal-Wallis test; CS:  $\chi^2= 66.3$ ,  $p < 2.4 \times 10^{-12}$ ; FM,  
156  $\chi^2= 54.1$ ,  $p < 7.0 \times 10^{-10}$ ; LO:  $\chi^2= 63.1$ ,  $p < 1.0 \times 10^{-11}$ ; PI:  $\chi^2=182.8$ ,  $p < 2.2 \times 10^{-16}$ ; TS:  $\chi^2= 5.8$ ,  $p = 0.44$ ,  
157 Figure 3).

158 *Camponotus semitestaceus* and *Formica moki* were relatively uncommon on *Olea* trees (Figure  
159 2A, 2B), while *P. imparis* used *Olea* trees more often than any other tree genus (Figure 2D). *C.*  
160 *semitestaceus* preferred *Quercus* and *Eucalyptus* trees over *Olea* and *Schinus* trees (Figure 2A). *F. moki*  
161 used most tree genera rather evenly but avoided *Olea* trees (Figure 2B). *Liometopum occidentale*  
162 preferred *Cedrus* trees and then *Quercus* (Figure 2C).

163

164 **Figure 2.** Ant presence by tree genus. Normalized ant presence is the number of trees on which an ant species was  
165 present divided by the total number of trees surveyed. Letters show significant differences in Dunn tests at the  $p <$   
166 0.05 level. Only tree genera with at least 50 individuals present in the study area were included separately; all other  
167 genera were included as “Other.” Panel F shows the proportion of each tree genus present. *Quercus* (in bold) is the  
168 only native genus among the six most abundant tree genera at the site.

169

170 Ants were observed significantly more often in native than non-native trees ( $t(7) = 6.2$ ,  $p =$   
171 0.0002, Figure 3A). Ants were also observed significantly more often in evergreen than deciduous trees  
172 ( $t(7) = -11.3$ ,  $p = 4.0 \times 10^{-6}$ , Figure 3B).

173

174 **Figure 3.** Normalized ant presence in native versus non-native trees (A) and deciduous versus evergreen trees (B).  
175 Normalized ant presence is the number of deciduous, evergreen, native, or non-native trees on which any ant species  
176 was present divided by the total number of that type of tree surveyed. \*\*\* indicates significance at the  $p < 0.001$   
177 level.

178

179 **Discussion**

180 Our study suggests that niche partitioning is occurring in a mixed oak-exotic woodland ant  
181 community along three different axes: season, day/night, and tree genus. While other studies have  
182 investigated seasonal partitioning or day/night partitioning separately, our study demonstrates that  
183 seasonal and day/night scales may interact to influence partitioning.

184

185 **Figure 4.** Differences in diel and seasonal ant activity among the most abundant ant species in a woodland ant  
186 community suggest niche partitioning. *Camponotus semitestaceus* was most active during spring and summer  
187 nights; *Formica moki* was most active during spring and summer days, and *Prenolepis imparis* was most active in  
188 fall and winter during both day and night. *Liometopum occidentale* was the second most active species during  
189 summer day, summer night, and winter day.

190

191 Thermal niche partitioning may account for the seasonal and diel patterns we observed.  
192 *Prenolepis imparis* foraged all day during fall, winter, and spring, which suggests this species relies on  
193 colder temperatures. Other studies have shown temperature-dependent activity in *P. imparis*; in other  
194 locations, *P. imparis* forages nocturnally in warm months and diurnally in cold months (10,30). *Formica*  
195 *moki* is active only during the day in warmer months, which could indicate a preference for warmer  
196 temperatures. By contrast, *Camponotus semitestaceus* has been observed to be nocturnal regardless of  
197 temperature or season (24). As in previous studies (10,31,32), we did not observe strong diel or seasonal  
198 activity patterns in *Liometopum occidentale* and *Tapinoma sessile*.

199 All species we observed foraged more frequently on native trees, particularly *Quercus* species.  
200 Some niche partitioning, however, occurred in exotic tree genera: *P. imparis* foraged frequently on *Olea*,  
201 and *L. occidentale* foraged most frequently on *Cedrus*, while other species avoided these two exotic tree  
202 genera. All species preferred to forage on evergreen trees independently of their preference for native  
203 trees, suggesting the distribution of honeydew resources may differ between evergreen and deciduous



204 trees. *Quercus agrifolia*, a native, evergreen species, was the most common tree at the field site and may  
205 play an important role in maintaining ant biodiversity.

206 Species differed in trail formation and in their spatial use of trees (Figure S1), which may  
207 facilitate niche partitioning. *C. semitestaceus* formed diffuse trails somewhat frequently (about 30% of  
208 observations) and foraged from loosely clumped nest aggregations in the ground (Figure S1). *F.*  
209 *moki* rarely formed trails (Figure S1) and was usually present in low abundance (Figure S3).

210 *L. occidentale* frequently formed large foraging trails (~60% of observations, Figure S1), and foraged in  
211 clumped trail networks of around three to five trees, which often included a nest tree.

212 Several of the ant species, including *F. moki*, *L. occidentale*, and *P. imparis*, have been described  
213 as dominant based on bait assays (9,10,17,26,33). Though we did not offer baits, we frequently observed  
214 these species foraging together, which does not support a dominance-discovery tradeoff (34). The ants we  
215 observed were probably foraging on trees for aphid honeydew, a spatially stable food source for which  
216 repeated discovery may not be needed. Parr & Gibb (2012, 35) suggest that ant communities that rely on  
217 honeydew do not demonstrate dominance-discovery tradeoffs.

218 Further research is needed to explore the degree of dietary overlap for these species and whether  
219 the limitation and distribution of honeydew resources influences ant community structure. Preferences for  
220 particular tree genera may be driven by differences among tree genera in aphid species composition and  
221 honeydew availability. The emerging threat of sudden oak death in *Quercus* may affect ant communities  
222 because these species may be disproportionately important in supporting honeydew-feeding ants. Thermal  
223 niche partitioning may have important consequences for coexistence after climate change.

224

## 225 **Bibliography:**

- 226 1. Gause G. The Struggle for Existence. New York: Williams & Wilkins Company; 1934. 163 p.
- 227 2. Hardin G. The Competitive Exclusion Principle. Science (80- ). 1960;131(3409):1292–7.
- 228 3. Finke D, Snyder W. Niche partitioning increases resource exploitation by diverse communities.  
229 Science (80- ). 2008;321(5895):1488–90.

- 230 4. Houadria M, Salas-Lopez A, Orivel J, Bluthgen N, Menzel F. Dietary and Temporal Niche  
231 Differentiation in Tropical Ants - Can They Explain Local Ant Coexistence? *Biotropica*.  
232 2015;47(2):208–17.
- 233 5. Kaspari M, O'Donnell S, Kercher JR. Energy, density, and constraints to species richness: Ant  
234 assemblages across a productivity gradient. *Am Nat*. 2000;155(2):280–93.
- 235 6. Hölldobler B, Wilson EO. *The Ants*. 1st ed. Berlin: Springer; 1990. 732 p.
- 236 7. Beattie AJ. *The Evolutionary Ecology of Ant-Plant Mutualisms*. Cambridge University Press;  
237 1985. 196 p.
- 238 8. Rosumek F, Silveira F, de S Neves F, de U Barbosa N, Diniz L, Oki Y, et al. Ants on plants: a  
239 meta-analysis of the role of ants as plant biotic defenses. *Oecologia*. 2009;160(3):537–49.
- 240 9. Fellers JH. Interference and exploitation in a guild of woodland ants. *Ecology*. 1987;68(5):1466–  
241 78.
- 242 10. Fellers JH. Daily and Seasonal Activity in Woodland Ants. *Oecologia* [Internet]. 1989;78(1):69–  
243 76. Available from: <http://www.jstor.org/stable/4218832>
- 244 11. Stuble KL, Rodriguez-Cabal MA, McCormick GL, Jurić I, Dunn RR, Sanders NJ. Tradeoffs,  
245 competition, and coexistence in eastern deciduous forest ant communities. *Oecologia*.  
246 2013;171(4):981–92.
- 247 12. Albrecht M, Gotelli NJ. Spatial and temporal niche partitioning in grassland ants. *Oecologia*.  
248 2001;126(1):134–41.
- 249 13. Carval D, Cotté V, Resmond R, Perrin B, Tixier P. Dominance in a ground-dwelling ant  
250 community of banana agroecosystem. *Ecol Evol*. 2016;6(23):8617–31.
- 251 14. Narendra A, Greiner B, Ribí WA, Zeil J. Light and dark adaptation mechanisms in the compound  
252 eyes of *Myrmecia* ants that occupy discrete temporal niches. *J Exp Biol* [Internet].  
253 2016;219(16):2435–42. Available from: <http://jeb.biologists.org/lookup/doi/10.1242/jeb.142018>
- 254 15. Bestelmeyer BT. The trade-off between thermal tolerance and behavioural dominance in a  
255 subtropical south american ant community. *J Anim Ecol*. 2000;69(6):998–1009.

- 256 16. Cerda X, Retana J, Cros S, Journal S, May N, Cerda XIM, et al. Thermal Disruption of Transitive  
257 Hierarchies in Mediterranean Ant Communities Published by : British Ecological Society Thermal  
258 disruption of transitive hierarchies in Mediterranean ant communities. 1997;66(3):363–74.
- 259 17. Wittman SE, Sanders NJ, Ellison AM, Jules ES, Ratchford JS, Gotelli NJ. Species interactions and  
260 thermal constraints on ant community structure. *Oikos*. 2010;119(3):551–9.
- 261 18. Stahlschmidt ZR, Johnson D. Moving targets : determinants of nutritional preferences and habitat  
262 use in an urban ant community. 2018;1151–8.
- 263 19. Vonshak M, Gordon DM. Intermediate disturbance promotes invasive ant abundance. *Biol*  
264 *Conserv* [Internet]. 2015;186:359–67. Available from:  
265 <http://dx.doi.org/10.1016/j.biocon.2015.03.024>
- 266 20. Bluthgen N, Verhaagh M, Goitia W, Jaffe K, Morawetz W, Barthlott W. How plants shape the ant  
267 community in the Amazonian rainforest canopy: the key role of extrafloral nectaries and  
268 homopteran honeydew. *Oecologia*. 2000;125(2):229–40.
- 269 21. Davidson D, Cook S, Snelling R, Chua T. Explaining the abundance of ants in lowland tropical  
270 rainforest canopies. *Science* (80- ). 2003;300(5621):969–72.
- 271 22. Styrsky JD, Eubanks MD. Ecological consequences of interactions between ants and honeydew-  
272 producing insects. *Proc R Soc B Biol Sci*. 2007;274(1607):151–64.
- 273 23. Southwood TRE, Moran VC, Kennedy CEJ. The Richness , Abundance and Biomass of the  
274 Arthropod Communities on Trees. *J Anim Ecol*. 1982;51(2):635–49.
- 275 24. Gano KA, Rogers LE. Colony density and activity times of the ant *Camponotus semitestaceus*  
276 (Hymenoptera: Formicidae) in a shrub steppe community. *Ann Entomol Soc Am*. 1983;76(6):958–  
277 63.
- 278 25. Holway DA. Competitive Mechanisms Underlying the Displacement of Native Ants by the  
279 Invasive Argentine Ant. *Ecology* [Internet]. 1999;80(1):238–51. Available from:  
280 <http://www.jstor.org/stable/176993>
- 281 26. Lynch JF, Balinsky EC, Vail SG. Foraging patterns in three sympatric forest ant species,

- 282 Prenolepis imparis, Paratrechina melanderi and Aphaenogaster rudis (Hymenoptera: Formicidae).  
283 Ecol Entomol. 1980;5(4):353–71.
- 284 27. Cain J, Nilan R. Rudolph Ulrich and the Stanford Arizona Garden. Sandstone Tile. 2003;27(2):3–  
285 13.
- 286 28. Rizzo DM, Garbelotto M. Sudden oak death : endangering California and Oregon forest  
287 ecosystems. Front Ecol Env. 2003;1(5):197–204.
- 288 29. MacArthur-Waltz D, Lee G, Nelson R, Gu A, Coleman D, Glockner E, et al. Spatial and temporal  
289 partitioning and tree preference in California woodland ants [Internet]. Stanford Digital  
290 Repository; 2017. Available from: <https://purl.stanford.edu/qz365hg2497>
- 291 30. Talbot M. Population Studies of the Ant, Prenolepis Imparis Say. Ecolgoy. 1943;24(1):31–44.
- 292 31. Smith MR. The Biology of Tapinoma Sessile Say, An Important House-Infesting Ant. Ann  
293 Entomol Soc Am. 1927;(122):307–30.
- 294 32. Barbani LE. Foraging activity and food preferences of the odorous house ant (Tapinoma sessile  
295 Say) (Hymenoptera: Formicidae). Virginia Polytechnic Institute; 2003.
- 296 33. Hoey-Chamberlain R, Rust MK, Klotz JH. A Review of the Biology, Ecology, and Behavior of  
297 Velvety Tree Ants of North America. Sociobiology. 2013;60(1):1–10.
- 298 34. Feener DH, Matthew OR, Wackford K, Longo J, Benson W, Gilbert L. Geographic variation in  
299 resource dominance-discovery in Brazilian ant communities. Ecology. 2008;89(7):1824–36.
- 300 35. Parr CL, Gibb H. The discovery-dominance trade-off is the exception, rather than the rule. J Anim  
301 Ecol. 2012;81(1):233–41.
- 302

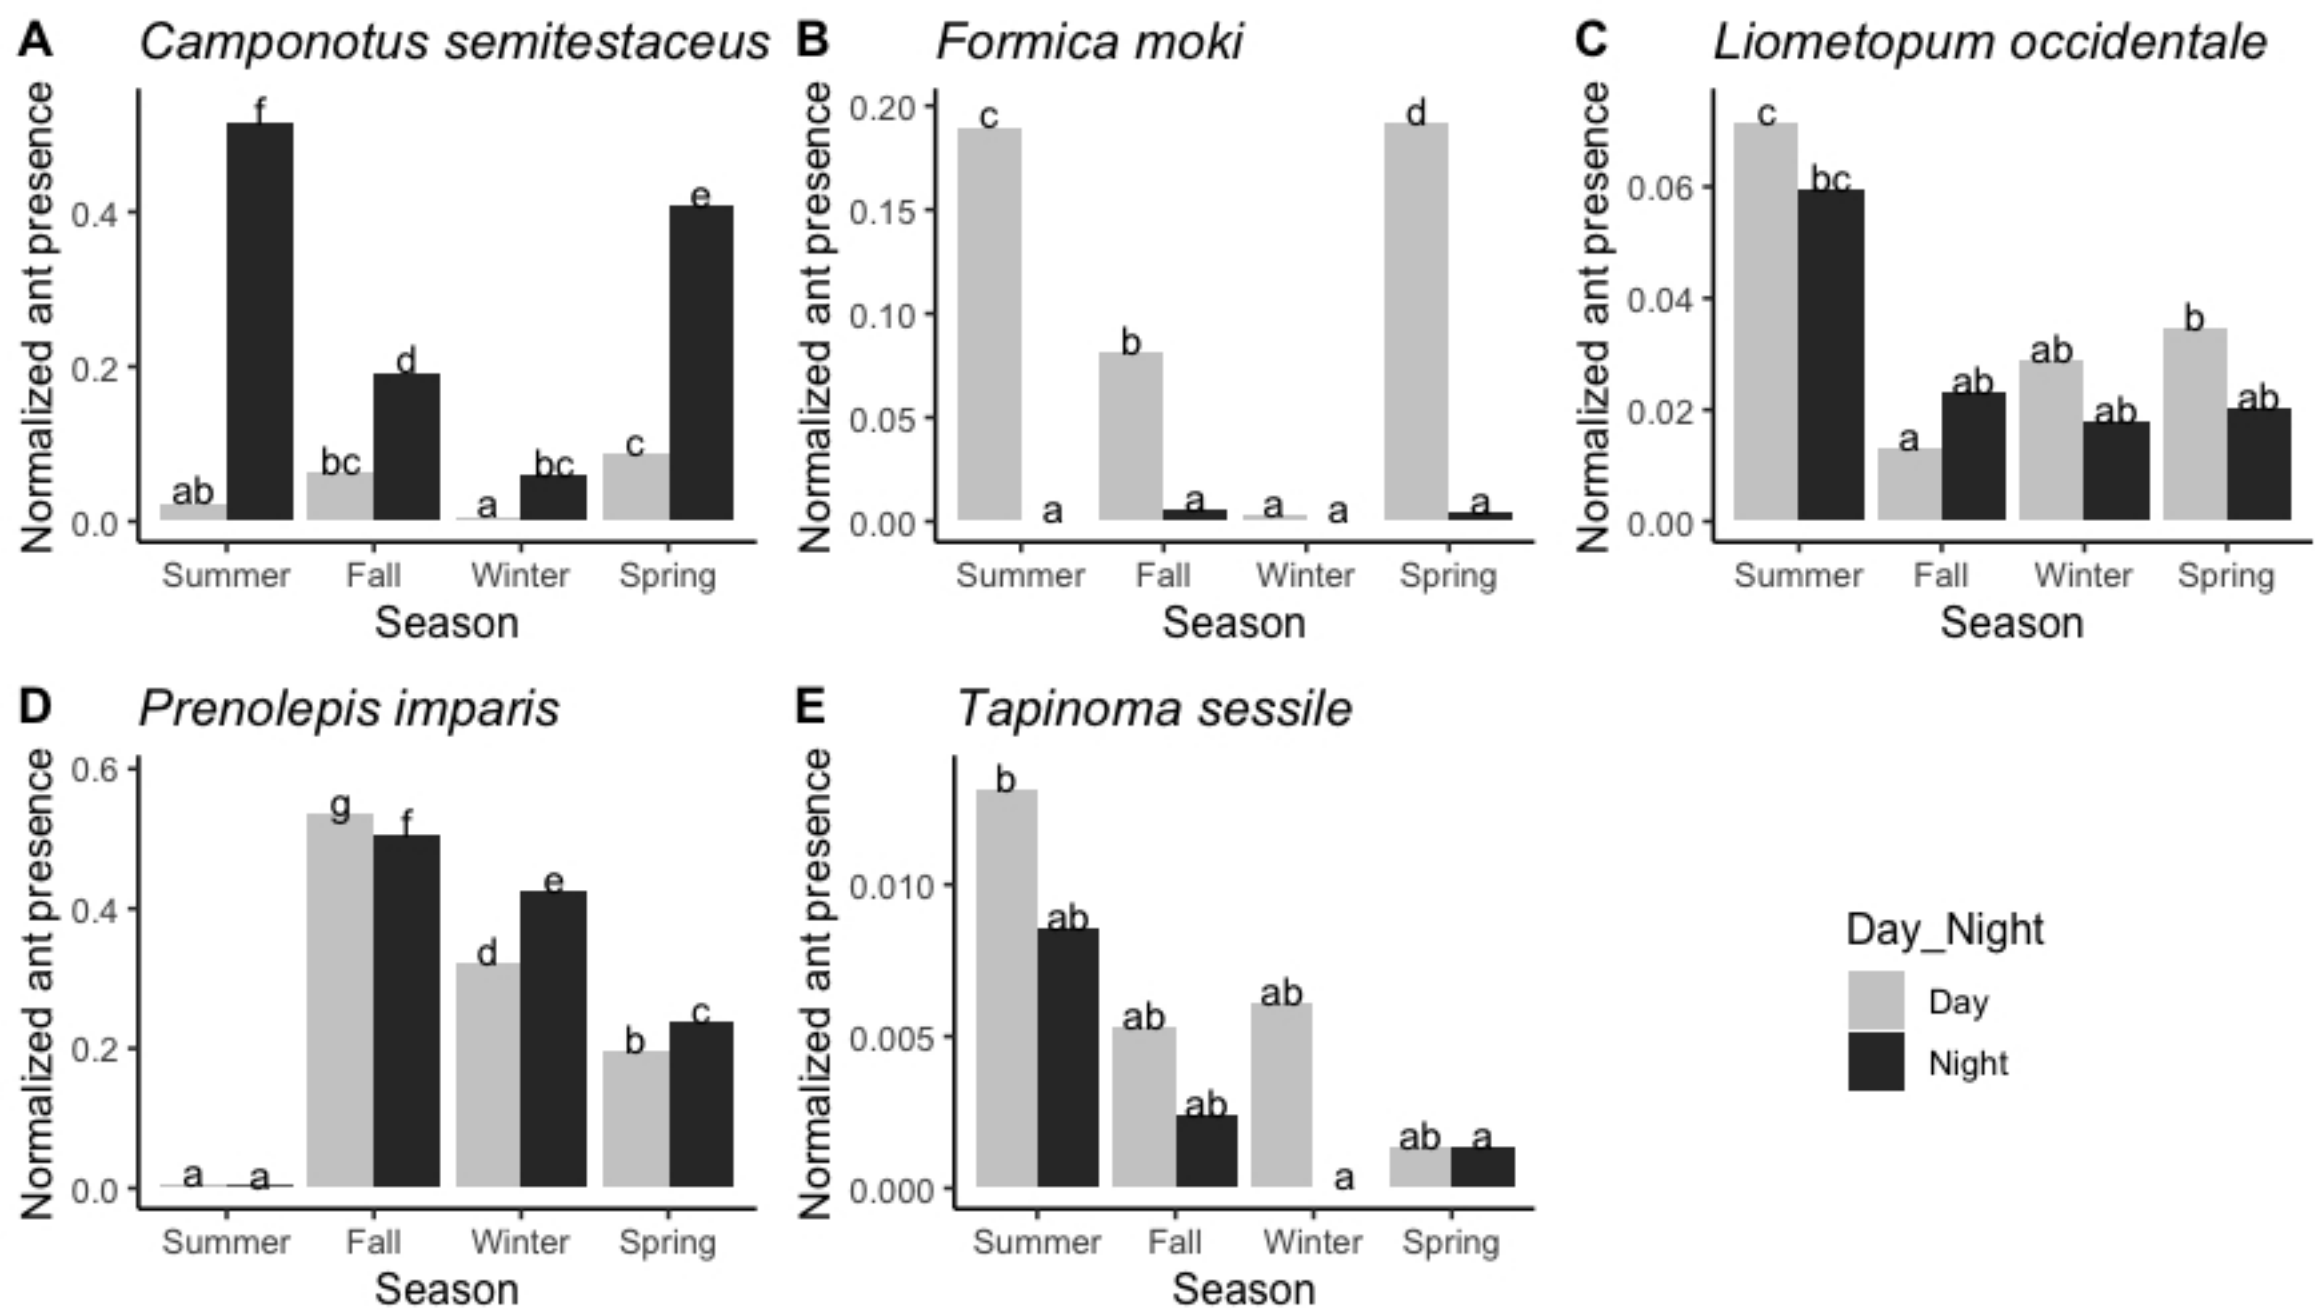

Figure 1

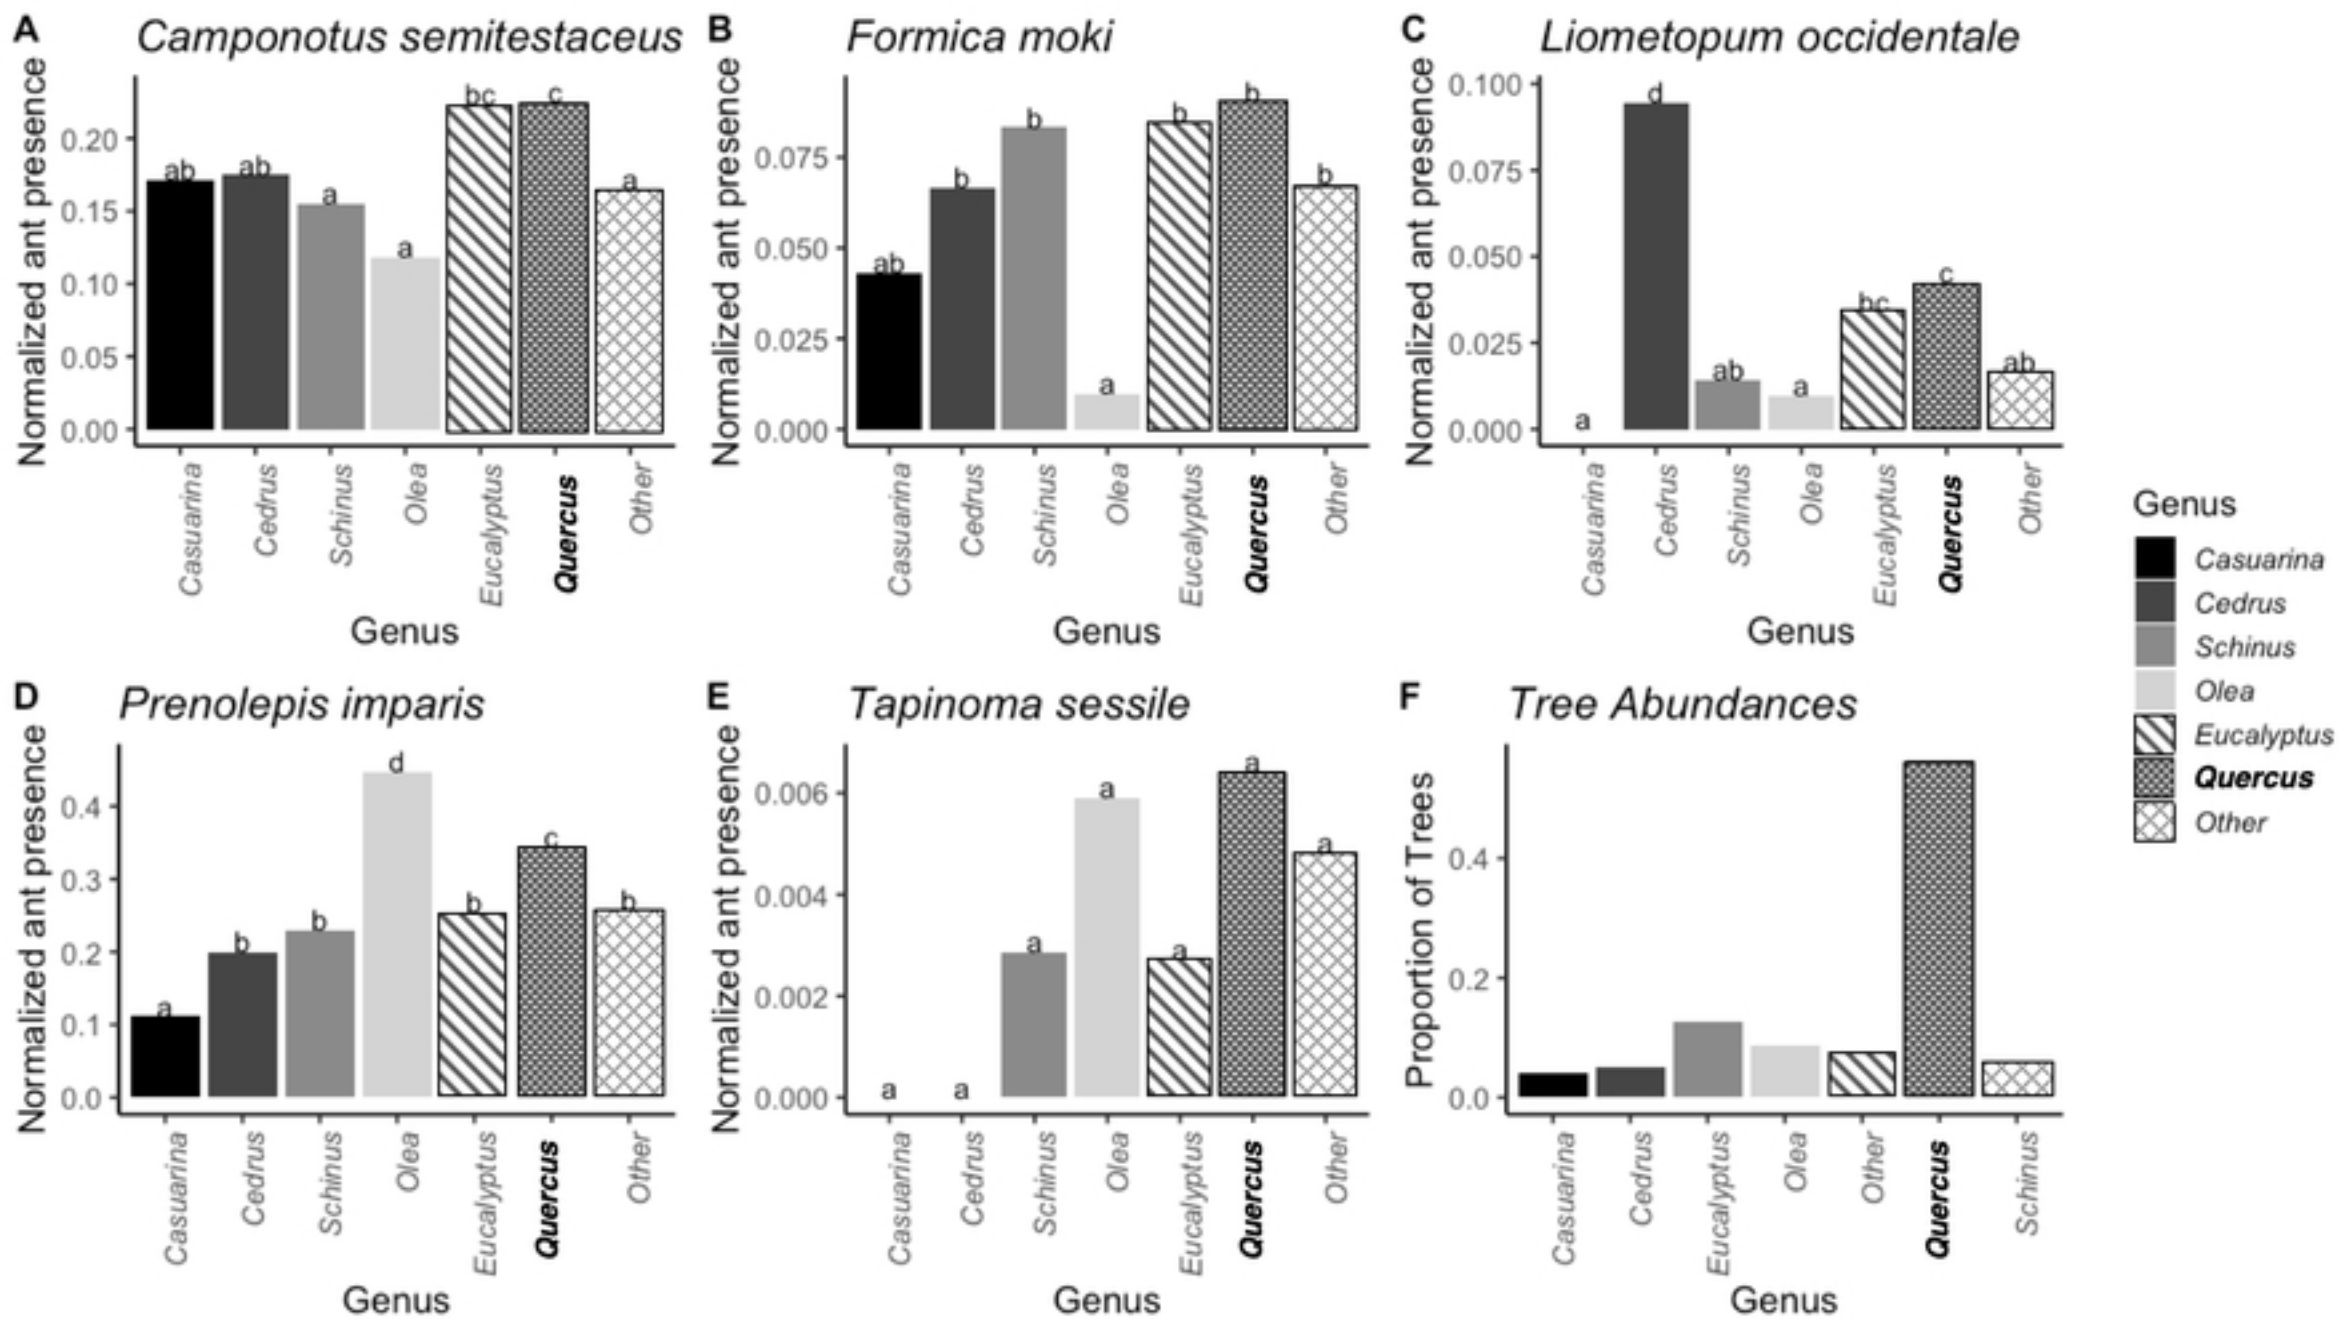

Figure 2

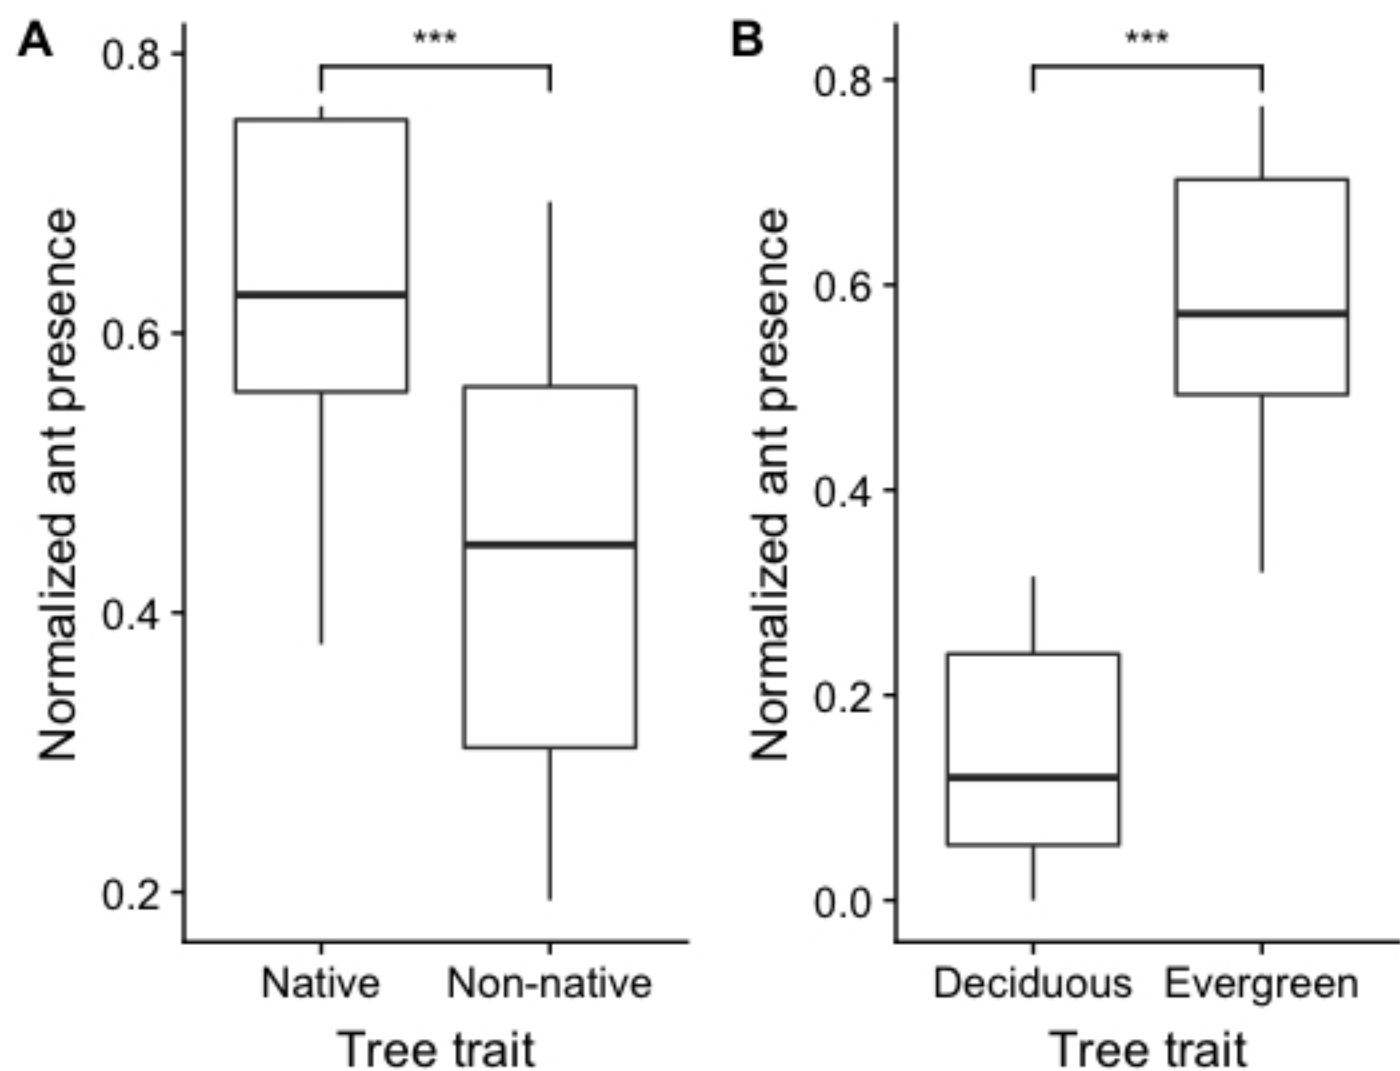

Figure 3

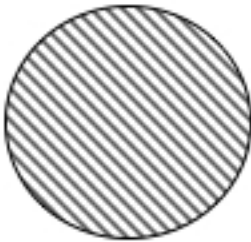 *Camponotus semitestaceus*

*Liometopum occidentale* 

 *Formica moki*

*Prenolepis imparis* 

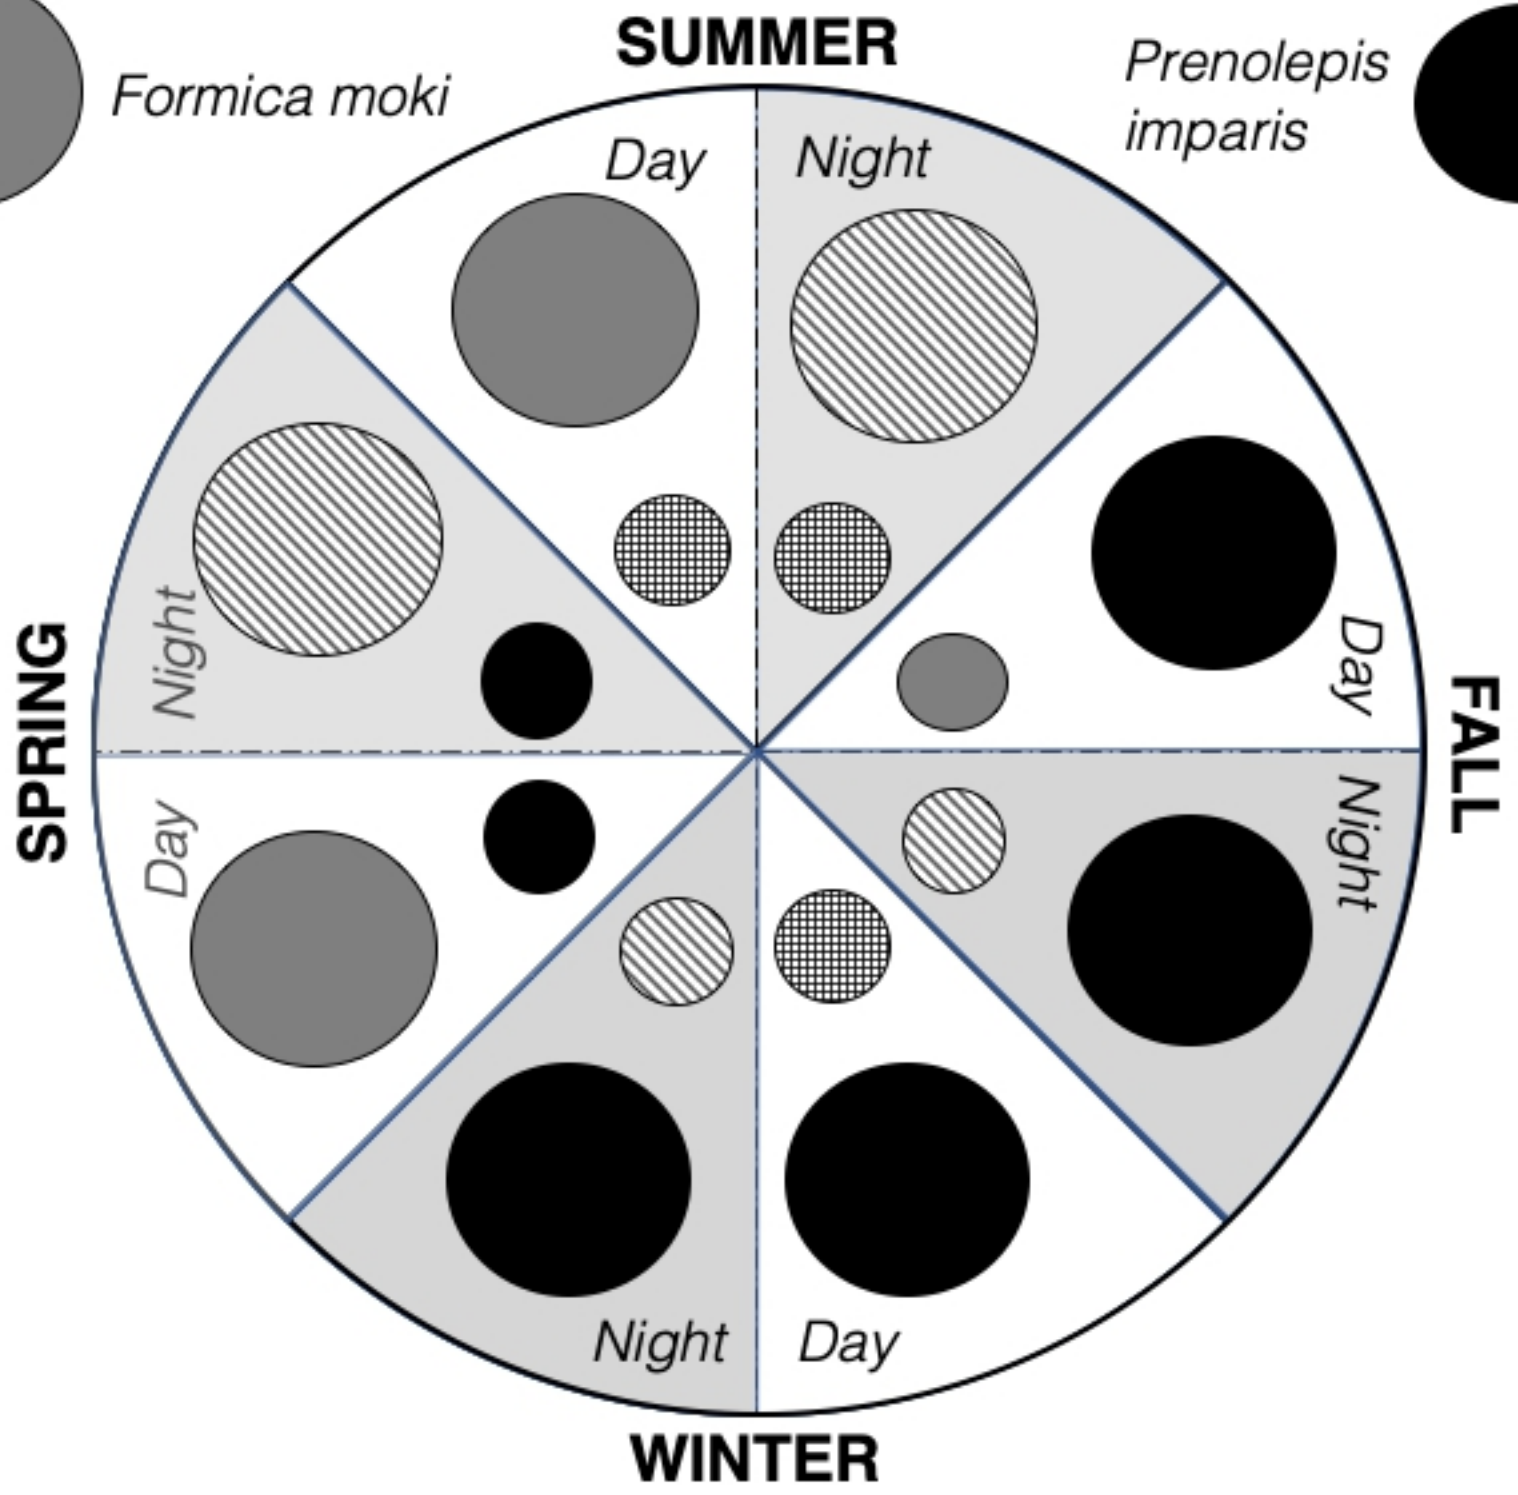

Figure 4
